# Supplementary material for: Combination of Proteogenomics with Peptide De Novo Sequencing Identifies New Genes and Hidden Posttranscriptional Modifications
Source: PubMed Central journal article supplement (PMC6794485; doi:10.1128/mbio.02367-19), 2019-10-15

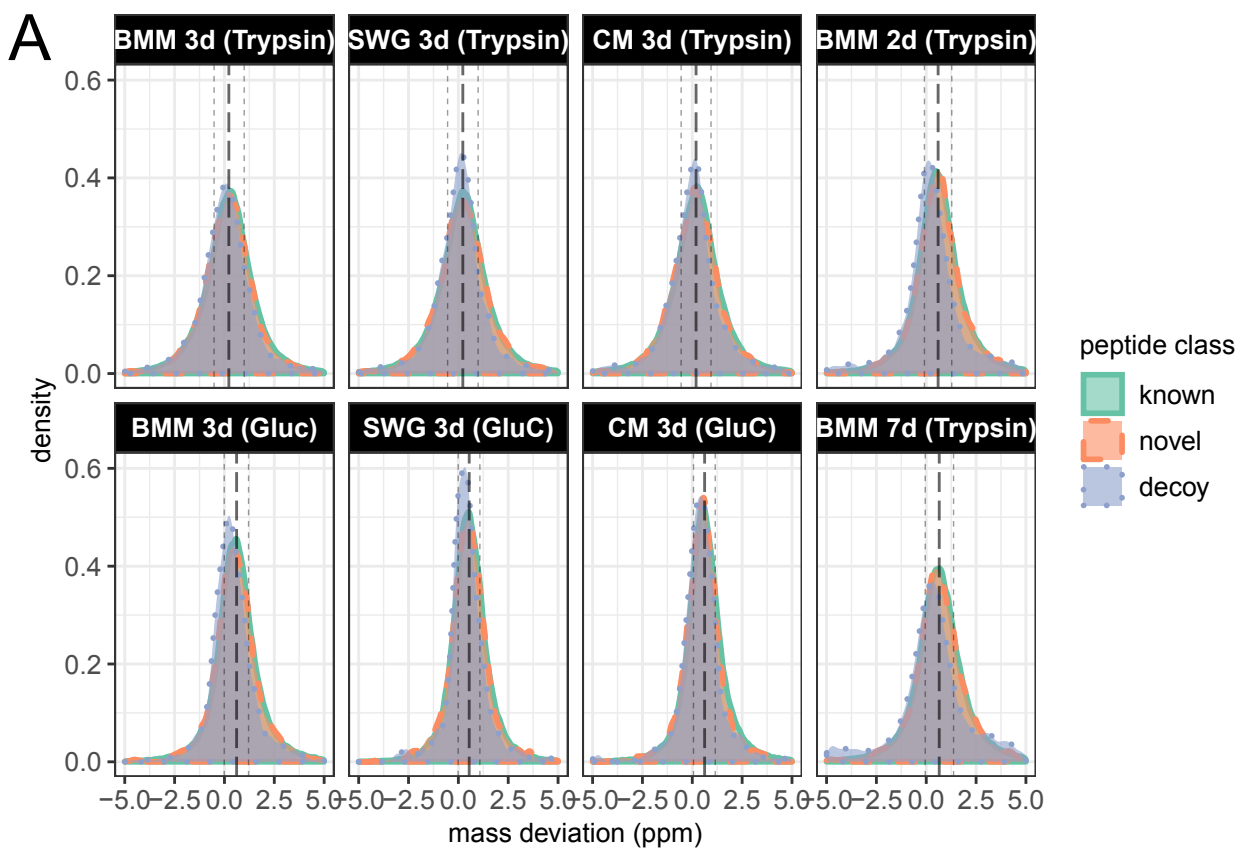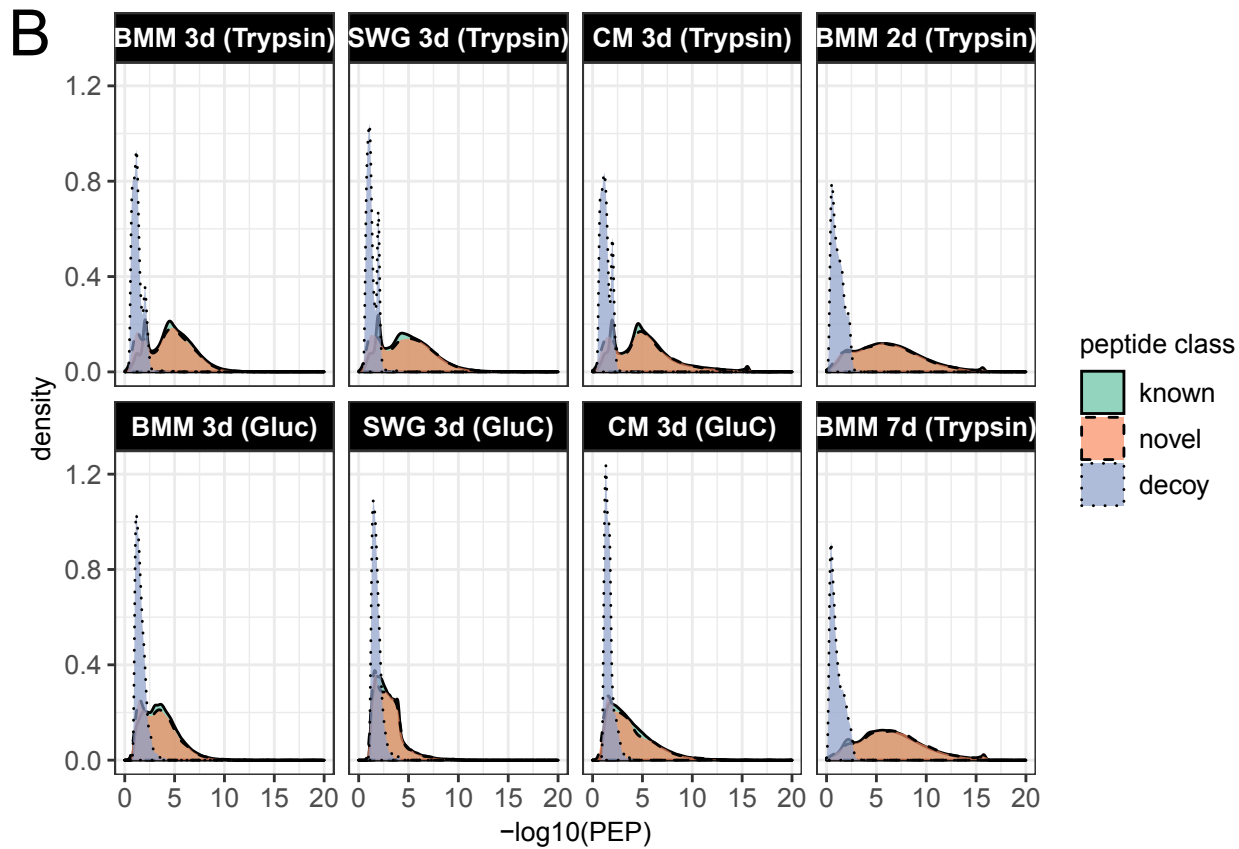

Supplement: mBio.02367-19-sf001.pdf [file mBio.02367-19-sf001.pdf]
