# Supplementary material for: Combination of Proteogenomics with Peptide De Novo Sequencing Identifies New Genes and Hidden Posttranscriptional Modifications
Source: PubMed Central journal article supplement (PMC6794485; doi:10.1128/mbio.02367-19), 2019-10-15

A

## BLAST2GO Analysis: Overall tag distribution

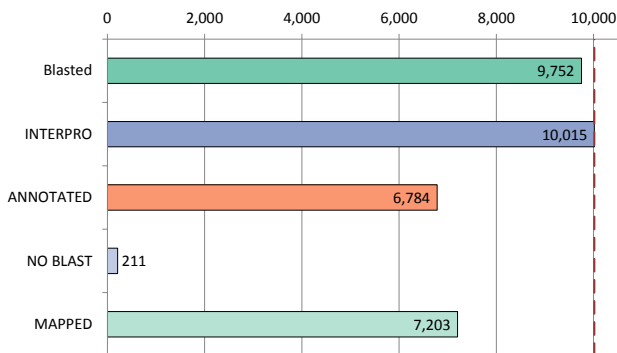

B

BLAST2GO Analysis:  
E-Value distribution with a cutoff of 1.0E-10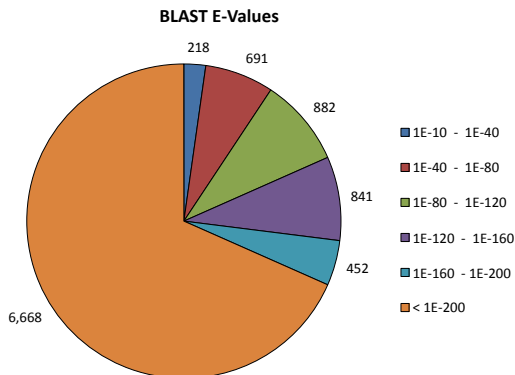

C

## GO Enrichment: Proteins exclusively in 7d sample (n = 410)

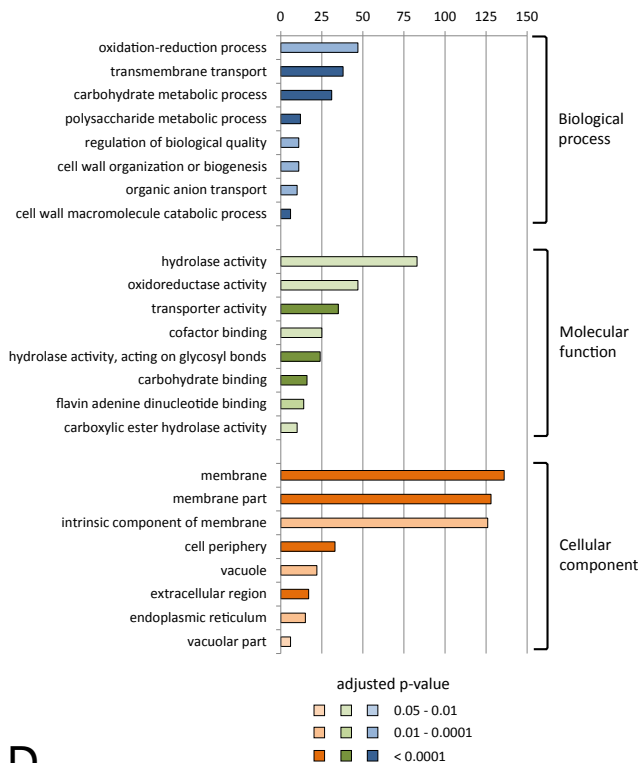

D

## GO Enrichment: Proteins exclusively in 2d sample (n = 115)

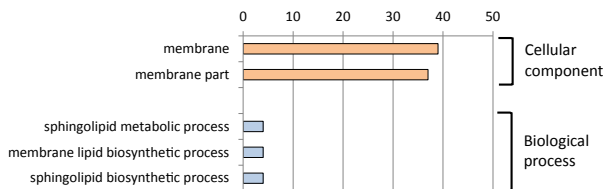

Supplement: mBio.02367-19-sf003.pdf [file mBio.02367-19-sf003.pdf]
