# Supplementary material for: Combination of Proteogenomics with Peptide De Novo Sequencing Identifies New Genes and Hidden Posttranscriptional Modifications
Source: PubMed Central journal article supplement (PMC6794485; doi:10.1128/mbio.02367-19), 2019-10-15
Supplement: mBio.02367-19-st001.pdf [file mBio.02367-19-st001.pdf]

## Supplementary Tables

**Tab. S1:** Overview of all spectra, PSMs, identified known and novel peptides in this study

| <b>Dataset</b>   | <b>Number of spectra</b> | <b><math>\Sigma</math> identified spectra (1% FDR)</b> | <b>Total spectra identification rate (1% FDR)</b> | <b>Total identified peptides (1% FDR)</b> | <b>Novel peptides</b> |
|------------------|--------------------------|--------------------------------------------------------|---------------------------------------------------|-------------------------------------------|-----------------------|
| BMM 3d (Trypsin) | 527,522                  | 291,298                                                | 55.22%                                            | 72,178                                    | 2,099                 |
| BMM 3d (GluC)    | 412,173                  | 177,812                                                | 43.14%                                            | 66,717                                    | 2,018                 |
| CM 3d (Trypsin)  | 551,679                  | 319,753                                                | 57.96%                                            | 71,380                                    | 2,061                 |
| CM 3d (GluC)     | 352,938                  | 94,834                                                 | 26.87%                                            | 47,073                                    | 1,518                 |
| SWG 3d (Trypsin) | 525,222                  | 200,844                                                | 38.24%                                            | 62,934                                    | 1,780                 |
| SWG 3d (GluC)    | 433,022                  | 69,890                                                 | 16.14%                                            | 41,164                                    | 1,430                 |
| BMM 2d (Trypsin) | 633,446                  | 347,255                                                | 54.82%                                            | 69,663                                    | 1,918                 |
| BMM 7d (Trypsin) | 591,019                  | 374,115                                                | 60.33%                                            | 67,396                                    | 1,765                 |
| <b>Total</b>     | <b>4,027,021</b>         | <b>1,875,801</b>                                       | <b>46.58%</b>                                     | <b>203,275</b>                            | <b>7,803</b>          |
